# Supplementary material for: Evaluation of precipitation measurement methods using data from precision lysimeter network
Source: Copernicus journal article supplement (doi:10.5194/hess-2022-370), 2022-12-01
Supplement: Supplementary file [file hess-2022-370-AC2-supplement.pdf]

Supplement for reply on "Comment on hess-2022-370", Anonymous Referee #2, 07 Feb 2023"

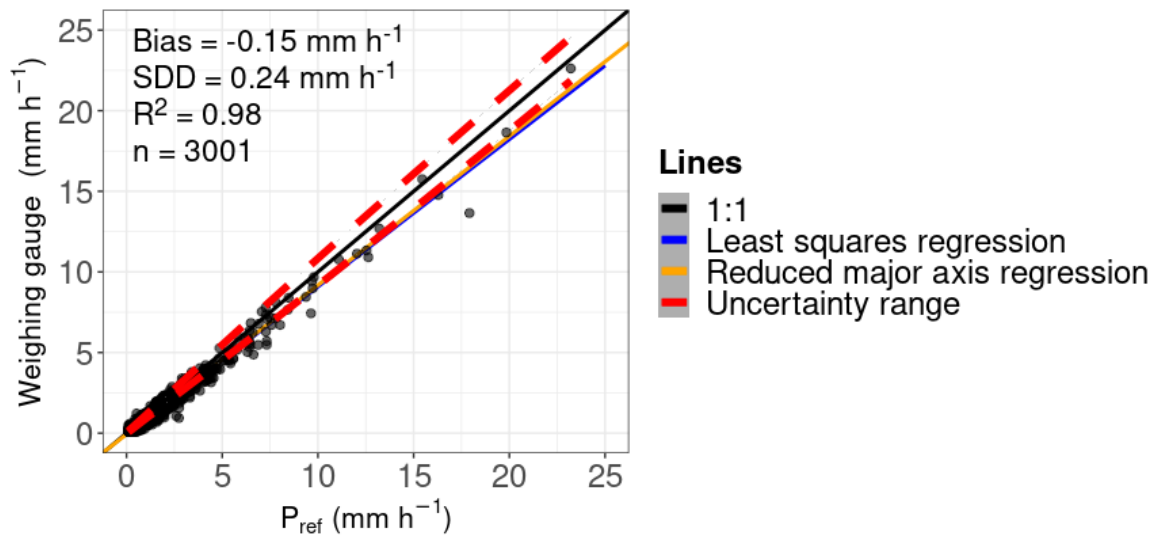

Figure 1. Comparison of hourly precipitation data determined by a weighable gauge and lysimeters ( $P_{ref}$ ) from Rollesbroich lysimeter station.

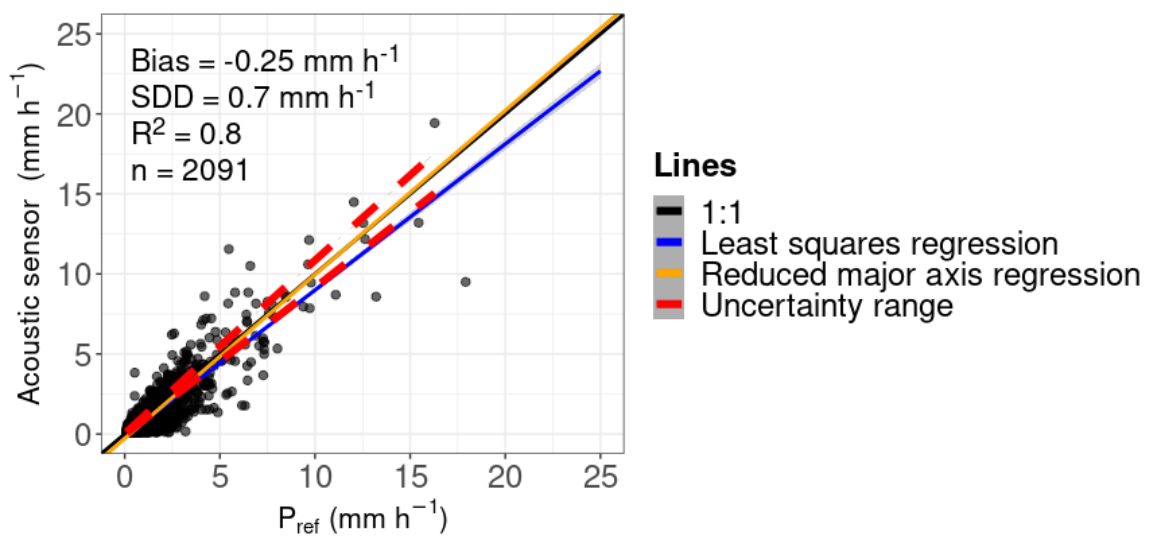

Figure 2. Comparison of hourly precipitation data determined by an acoustic sensor and lysimeters ( $P_{ref}$ ) from Rollesbroich lysimeter station.

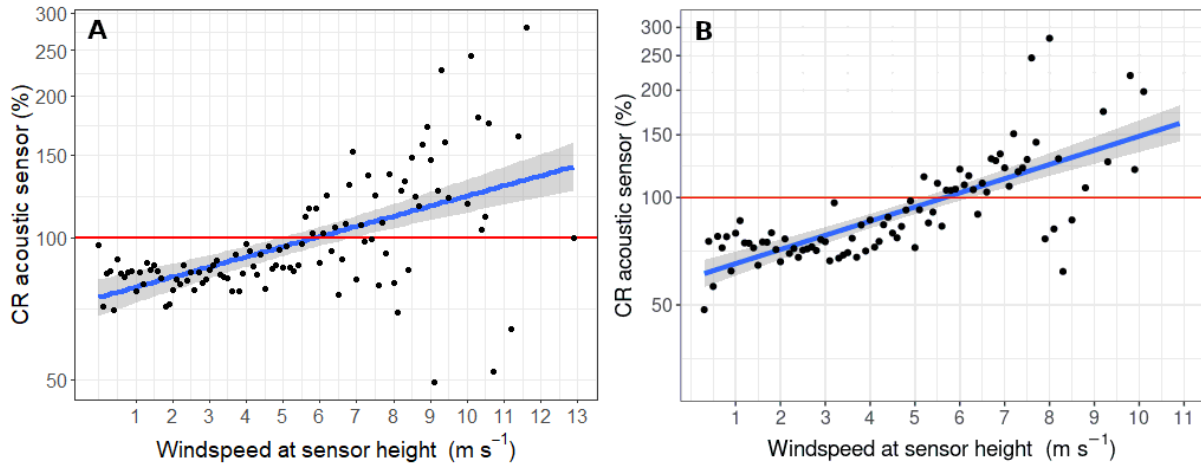

Figure 3. Catching ratios (CRs) of the acoustic sensor (Selhausen lysimeter station) as functions of the wind speed at sensor height and precipitation classified as “Rain”. The data was categorised and averaged with each category containing data within a range of  $0.1 \text{ m s}^{-1}$  for wind speeds ranging from  $0.0$  to  $12.0 \text{ m s}^{-1}$ . A: Data on 10-min basis with  $P_{\text{gauge}}$  and  $P_{\text{ref}} \geq 0.1 \text{ mm } 10\text{min}^{-1}$ ; B: Data on hourly basis with  $P_{\text{gauge}}$  and  $P_{\text{ref}} \geq 0.1 \text{ mm h}^{-1}$ .

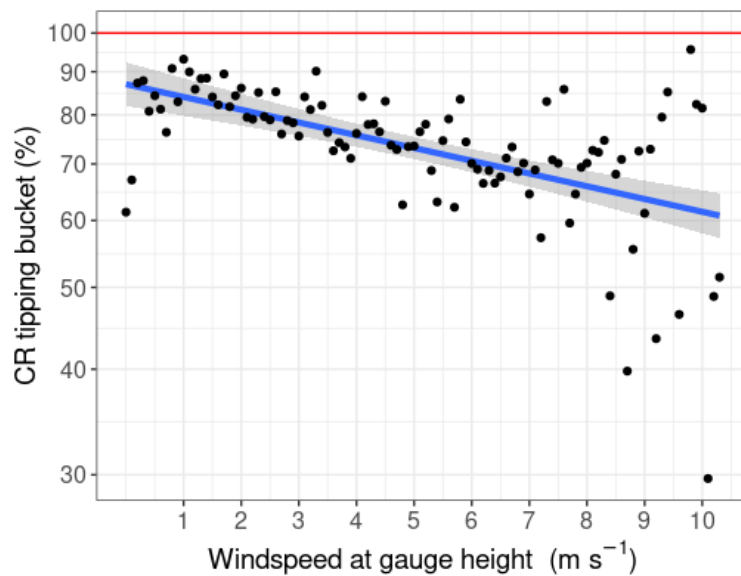

Figure 4. Catching ratios (CRs) of the tipping bucket gauge (Rollesbroich EC station) as functions of the wind speed at gauge height.  $P_{\text{gauge}}$  and  $P_{\text{ref}} \geq 0.1 \text{ mm h}^{-1}$  and precipitation classified as “Rain”. The data was categorised and averaged with each category containing data within a range of  $0.1 \text{ m s}^{-1}$  for wind speeds ranging from  $0.0$  to  $12.0 \text{ m s}^{-1}$ .
